# Supplementary material for: Biologically-Inspired Water-Swelling-Driven Fabrication of Centimeter-Level Metallic Nanogaps
Source: MDPI journal article supplement (doi:10.3390/mi12070735), 2021-06-23
Supplement: s1 [file s1]

# Supporting Information

## **Biologically-inspired water-swelling-driven fabrication of centimetre-level metallic nanogaps**

**Lei Wang \*, Yanping Wang, Meiqin Dai, Qiuling Zhao and Xia Wang \***

Shandong Advanced Optoelectronic Materials and Technologies Engineering Laboratory, College of Mathematics and Physics, QingDao University of Science and Technology, Qingdao, China; a17854296575@163.com (Y.W.); daimeiq@163.com (M.D.); sdqlzhao@163.com (Q.Z.)

\*Correspondence: phdwangl@163.com; phwangxia@163.com

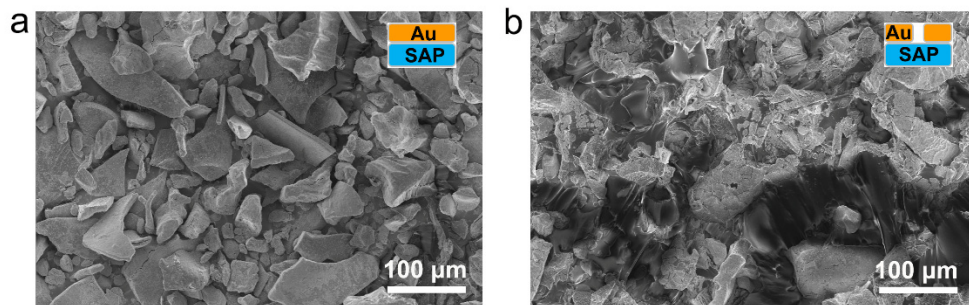

**Figure S1.** SEM characterization results. (a) SEM image of the Au/SAP structures before dropping deionized water. (b) SEM image of the Au-Gap/SAP structures after dropping deionized water.

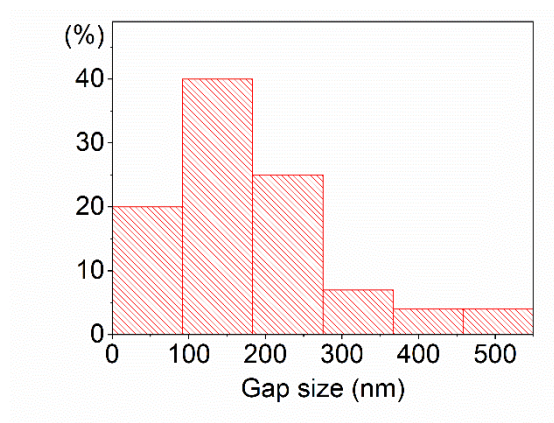

**Figure S2.** Statistical size distribution of 100 randomly-selected Au gaps.

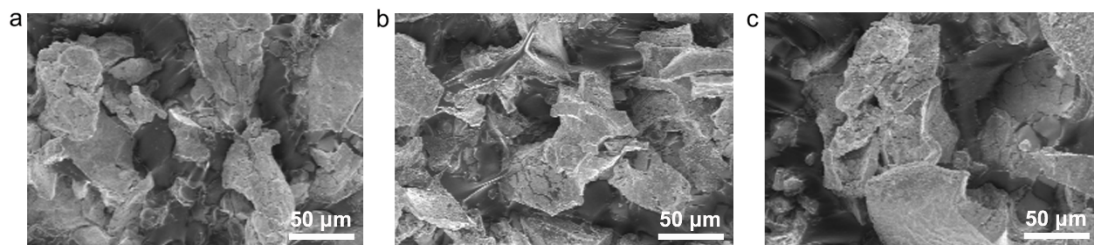

**Figure S3.** SEM characterization results of the gap structures. **(a)** SEM image corresponding to Figure 5a. **(b)** SEM image corresponding to Figure 5b. **(c)** SEM image corresponding to Figure 5f.

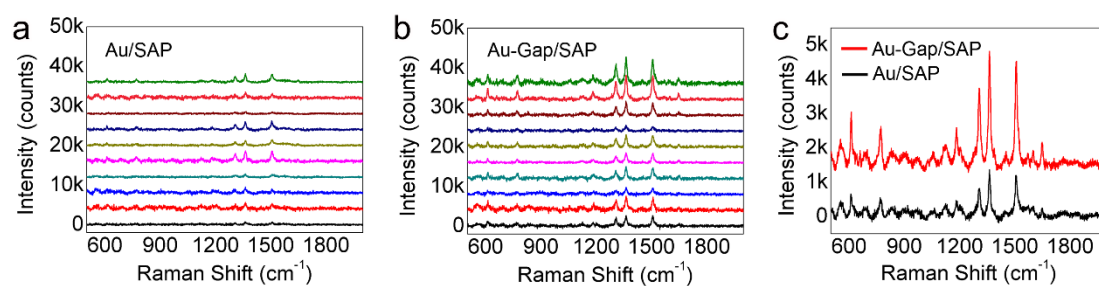

**Figure S4.** SERS effect of the Au-Gap/SAP structures. **(a)** SERS spectra of R6g molecules randomly collected from 10 different sites on the as-deposited large-area Au/SAP structures. **(b)** SERS spectra of R6g molecules randomly collected from 10 different sites on the large-area water-swelling-driven Au-Gap/SAP structures. **(c)** Average spectral intensity of the 10 SERS spectra shown in a and b, respectively.
